# Supplementary material for: Tailoring the cationic and anionic sites of LaFeO3-based perovskite generates multiple vacancies for efficient water oxidation
Source: Royal Society of Chemistry journal article supplement (doi:10.1039/d1ta03604a), 2021-01-01
Supplement: d1ta03604a1.pdf [file d1ta03604a1.pdf]

# Supporting Information

## **Tailoring the cationic and anionic sites of LaFeO<sub>3</sub>-based perovskite generates multiple vacancies for efficient water oxidation**

Paul Blessington Selvadurai A.,<sup>a,d,#</sup> Tuzhi Xiong,<sup>a,d,#</sup> Peng Huang,<sup>a,d</sup> Qirong Tan,<sup>a,d</sup> Yongchao Huang<sup>b</sup>, Hao Yang<sup>c</sup>, M.-Sadeeq (Jie Tang) Balogun,<sup>\*,a,d</sup>

<sup>a</sup>College of Materials Science and Engineering, Hunan University, Changsha 410082, China.

E-mail: [balogun@hnu.edu.cn](mailto:balogun@hnu.edu.cn)

<sup>b</sup>Institute of Environmental Research at Greater Bay, Key Laboratory for Water Quality and Conservation of the Pearl River Delta, Ministry of Education, Guangzhou University, Guangzhou 510006, China.

<sup>c</sup>School of Chemistry & Chemical Engineering, Guangxi University, Nanning, 530004, China.

<sup>d</sup>Hunan Joint International Laboratory of Advanced Materials and Technology for Clean Energy, Hunan University, Changsha 410082, China.

## Experimental Section Continues...

### Synthesis of LFCMO

The synthesis of LFCMO was the same with that of H-LFCMO without the reduction process.

### Synthesis of LFCO

The synthesis of LFCO was the same with that of LFCMO without the presence of  $(\text{NH}_4)_6\text{Mo}_7\text{O}_{24}$ .

### Synthesis of LFO

The synthesis of LFO was the same with that of LFCO without the presence of  $\text{Cr}(\text{NO}_3)_3 \cdot 9\text{H}_2\text{O}$ .

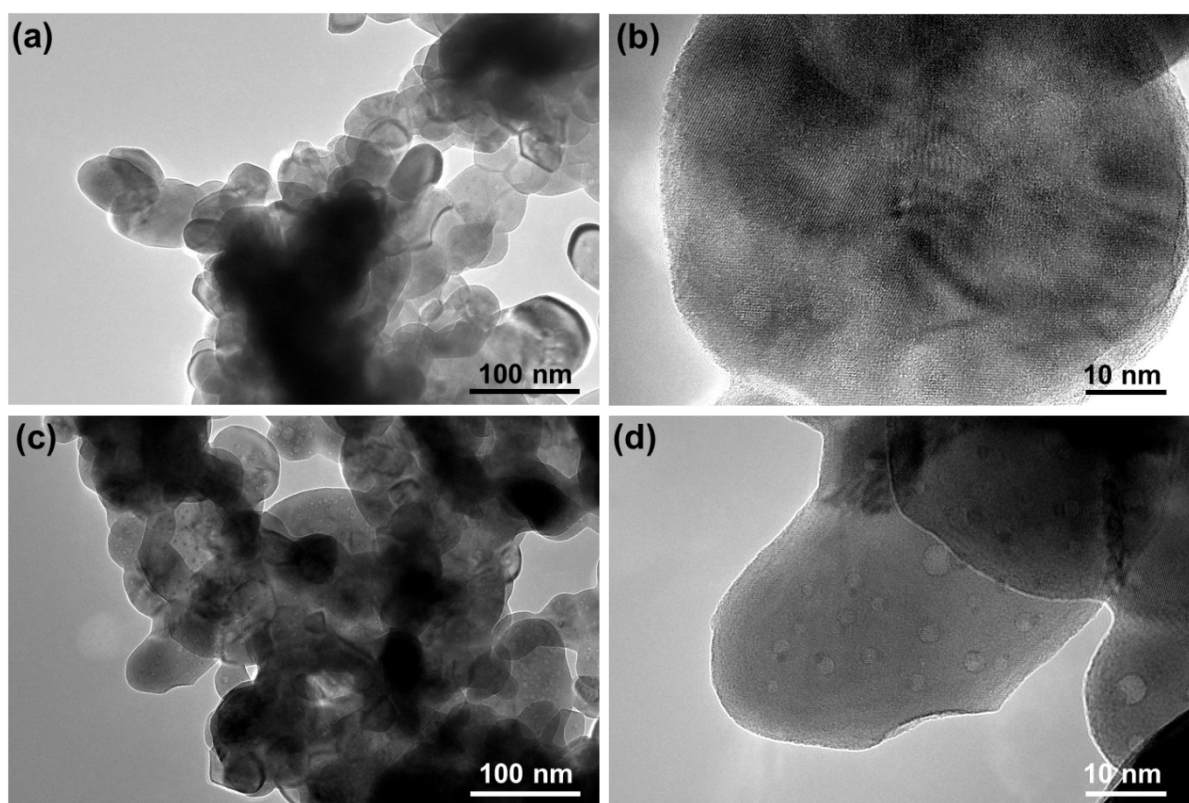

**Figure S1.** (a and b) Enlarge TEM images of LFCMO sample from Figure 1g. (c and d) Enlarged TEM images of H-LFCMO samples from Figure 1h.

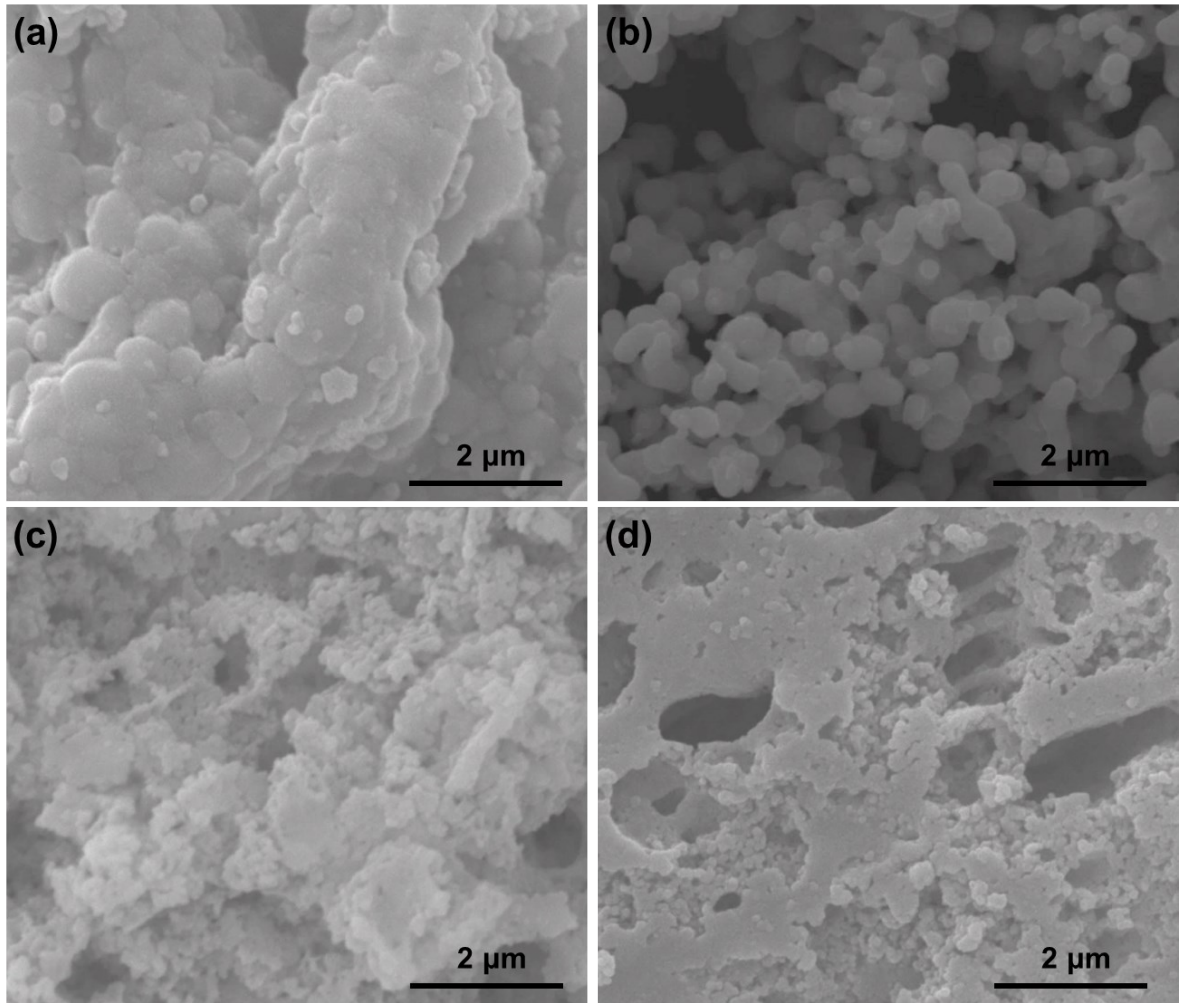

**Figure S2.** SEM images of (a) LFO, (b) LFCO, (c) LFCMO and (d) H-LFCMO samples.

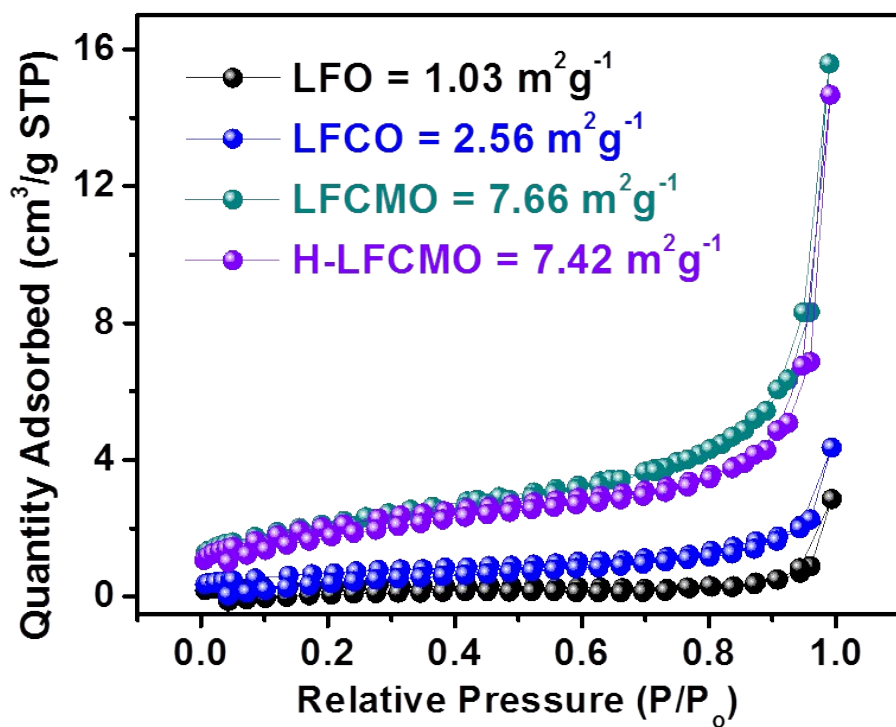

**Figure S3.** Nitrogen adsorption isotherms of the LFO, LFCO, LFCMO and H-LFCMO samples.

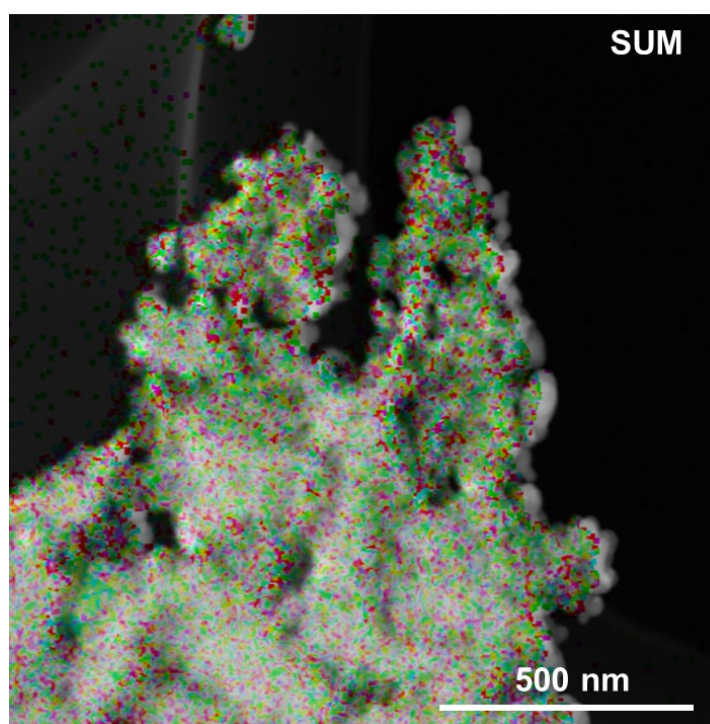

**Figure S4.** Corresponding EDX sum of the H-LFCMO sample.

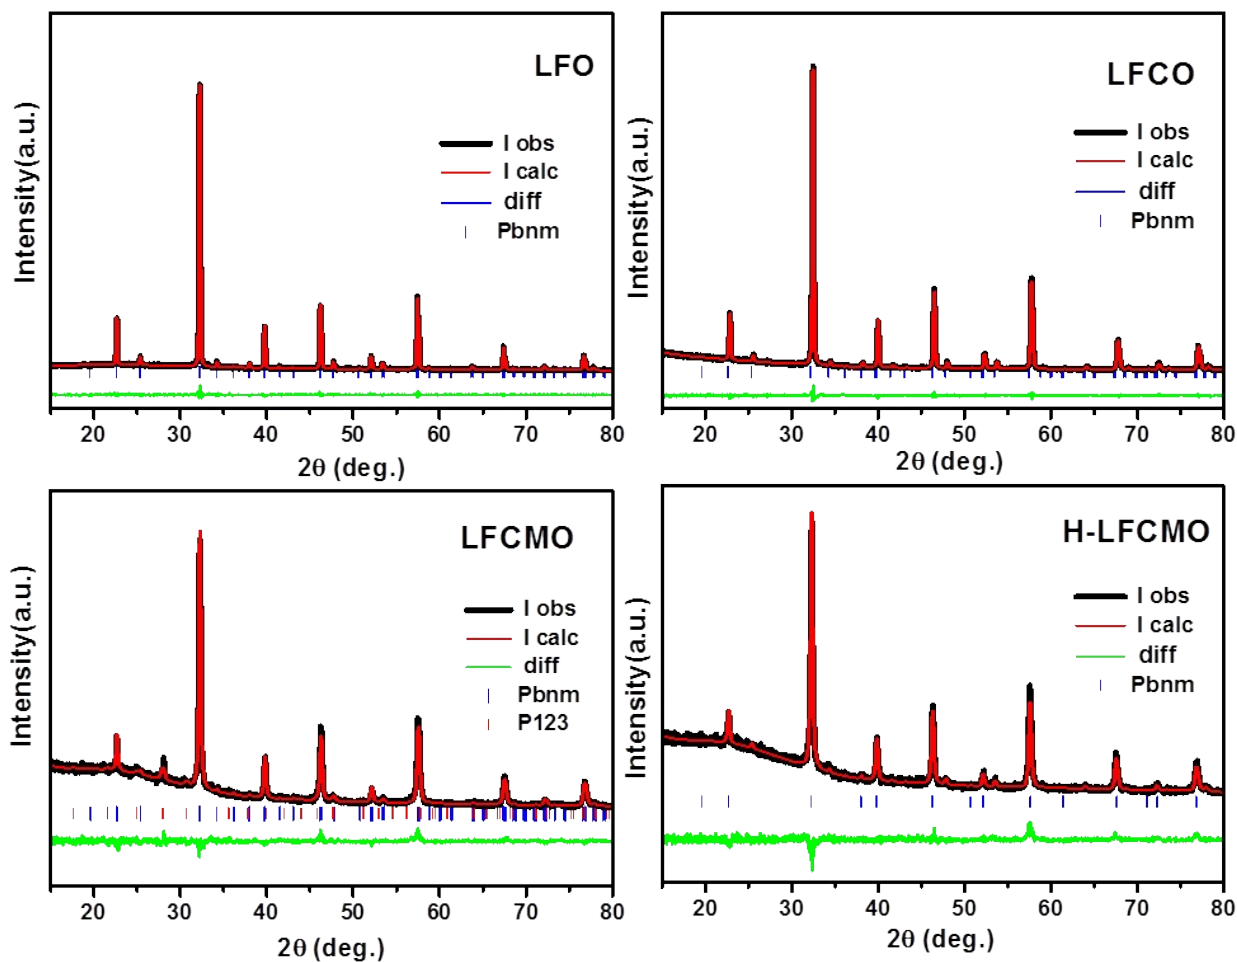

**Figure S5.** Reitveld refinement XRD patterns of the samples.

**Table S1.** The structural parameters derived from the refinement.

| Samples      | a<br>(Å) | b<br>(Å) | c<br>(Å) | V<br>(Å <sup>3</sup> ) | R <sub>p</sub> | % R <sub>wp</sub> | χ <sup>2</sup> |
|--------------|----------|----------|----------|------------------------|----------------|-------------------|----------------|
| LF           | 5.559(2) | 5.565(2) | 7.857(4) | 243.063                | 5.96           | 5.26              | 1.33           |
| LFC25        | 5.549(4) | 5.538(3) | 7.836(5) | 240.803                | 4.60           | 4.67              | 1.28           |
| LFCM10       | 5.557(1) | 5.553(1) | 7.846(1) | 242.112                | 6.79           | 7.52              | 1.52           |
| H-<br>LFCM10 | 5.555(1) | 5.557(1) | 7.848(2) | 241.068                | 6.36           | 9.92              | 1.34           |

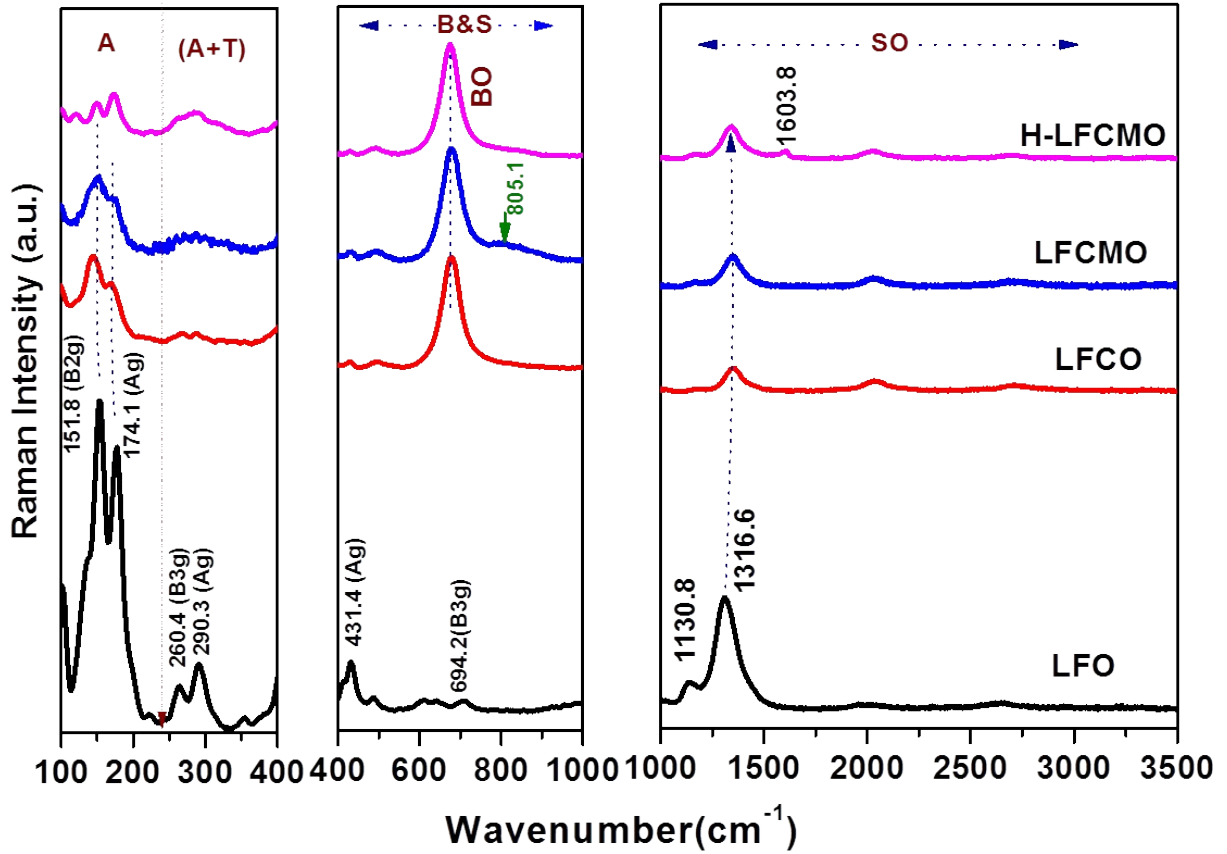

Figure S6. Raman spectra of the samples.

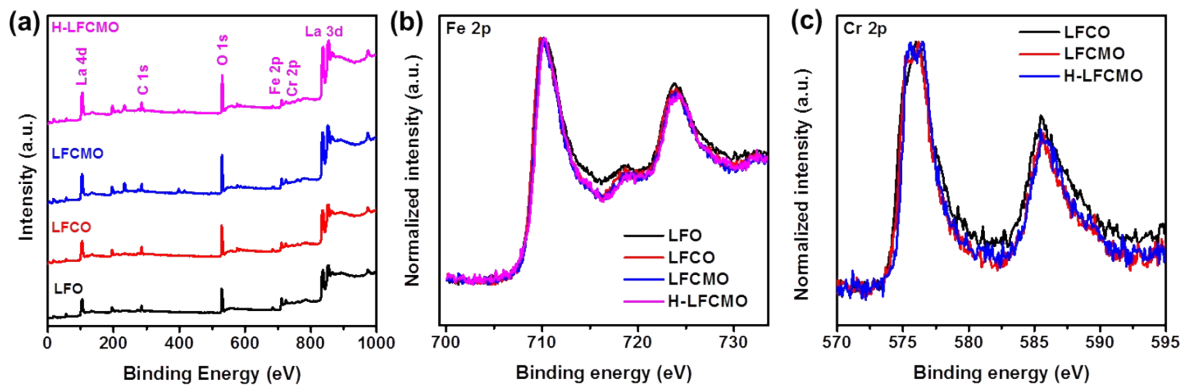

Figure S7. (a) Survey and (b) Fe 2p XPS spectra of the entire samples. (c) Cr 2p XPS spectra of LFCMO, LFCMO and H-LFCMO.

**Table S2.** Comparisons of OER catalytic performances of H-LFCMO and other related ABO<sub>3</sub>-based perovskites.

| Catalysts                                                                                                                    | Substrate          | Tafel<br>(mV dec <sup>-1</sup> ) | $\eta$ @10 mA<br>cm <sup>-2</sup> | Ref.      |
|------------------------------------------------------------------------------------------------------------------------------|--------------------|----------------------------------|-----------------------------------|-----------|
| H-LFCMO                                                                                                                      | Nickel foam        | 97                               | 263                               | This work |
| Ba <sub>0.9</sub> Sr <sub>0.1</sub> Co <sub>0.8</sub> Fe <sub>0.1</sub> Ir <sub>0.1</sub> O <sub>3-<math>\delta</math></sub> | Glassy Carbon      | 61.2                             | 300                               | [1]       |
| La <sub>0.7</sub> Sr <sub>0.3</sub> MnO <sub>3</sub>                                                                         | FTO                | 103                              | 430                               | [2]       |
| VG-LaCoO <sub>3</sub>                                                                                                        | Nickel foam        | 45                               | 342                               | [3]       |
| F-Ba <sub>0.5</sub> Sr <sub>0.5</sub> Co <sub>0.8</sub> Fe <sub>0.2</sub> O <sub>3-d</sub>                                   | Glassy Carbon      | 102.65                           | 220                               | [4]       |
| Sr(Co <sub>0.8</sub> Fe <sub>0.2</sub> ) <sub>0.7</sub> B <sub>0.3</sub> O <sub>3-<math>\delta</math></sub>                  | Glassy Carbon      | 60                               | 240                               | [5]       |
| SrCo <sub>0.4</sub> Fe <sub>0.2</sub> W <sub>0.4</sub> O <sub>3-<math>\delta</math></sub>                                    | Glassy Carbon      | 58                               | 292                               | [6]       |
| CQDs@Ba <sub>0.5</sub> Sr <sub>0.5</sub> Co <sub>0.8</sub> Fe <sub>0.2</sub> O <sub>3-d</sub>                                | Nickel foam        | 66                               | 350                               | [7]       |
| a-LaNiFeO <sub>3</sub> (t-d)                                                                                                 | Nickel foam        | 36                               | 189                               | [8]       |
| LaFeO <sub>2.85</sub> Cl <sub>0.15</sub>                                                                                     | Glassy Carbon      | 67                               | 500                               | [9]       |
| LF <sub>-0.25</sub> Ce                                                                                                       | Glassy Carbon      | 71.5                             | 330                               | [10]      |
| LaFe <sub>0.5</sub> Mn <sub>0.5</sub> O <sub>3</sub>                                                                         | Glassy Carbon      | 108                              | 454                               | [11]      |
| La <sub>0.9</sub> Fe <sub>0.92</sub> Ru <sub>0.08</sub> O <sub>3-<math>\delta</math></sub> -H-O                              | Glassy Carbon      | 39                               | 380                               | [12]      |
| La <sub>0.4</sub> Sr <sub>0.6</sub> Ni <sub>0.5</sub> Fe <sub>0.5</sub> O <sub>3</sub>                                       | Glassy Carbon      | 52.77                            | 320                               | [13]      |
| 3DOM-LFC82                                                                                                                   | Glassy Carbon      | 56                               | 410                               | [14]      |
| La <sub>0.2</sub> Sr <sub>0.8</sub> FeO <sub>3</sub>                                                                         | Glassy Carbon      | 58                               | 318                               | [15]      |
| MoS <sub>2</sub> -SrCoO <sub>3-<math>\delta</math></sub>                                                                     | Glassy Carbon      | 38                               | 351                               | [16]      |
| Ce <sub>0.8</sub> Sr <sub>0.2</sub> Co <sub>0.8</sub> Fe <sub>0.2</sub> O <sub>3-<math>\delta</math></sub>                   | Glassy Carbon      | 40.7                             | 440                               | [17]      |
| 80nm LaCoO <sub>3</sub>                                                                                                      | Glassy Carbon      | 69                               | 490                               | [18]      |
| LaFe <sub>0.2</sub> Ni <sub>0.8</sub> O <sub>3</sub>                                                                         | Glassy Carbon      | 50                               | 302                               | [19]      |
| La <sub>1-x</sub> Sr <sub>x</sub> Co <sub>1-y</sub> Fe <sub>y</sub> O <sub>3-<math>\delta</math></sub>                       | Carbon Fiber Paper | 109                              | 440                               | [20]      |

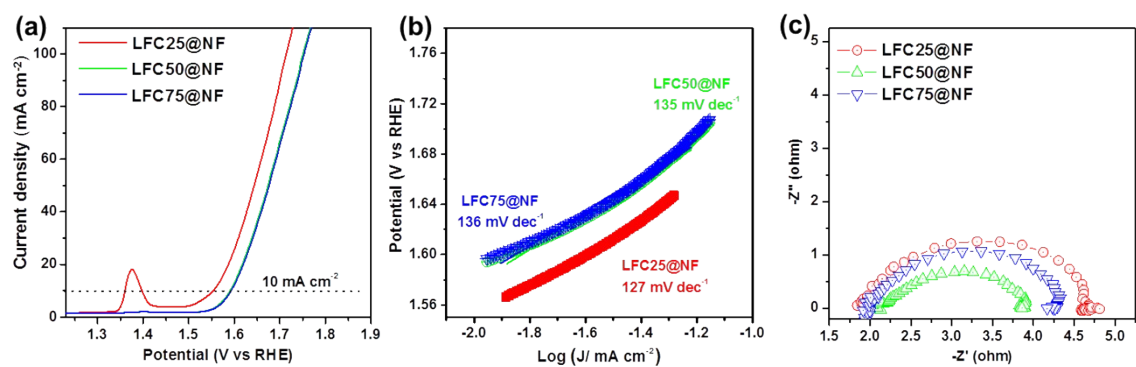

**Figure S8.** (a) LSV curves, (b) Tafel slope and (c) EIS spectra LFCO with different Cr content.

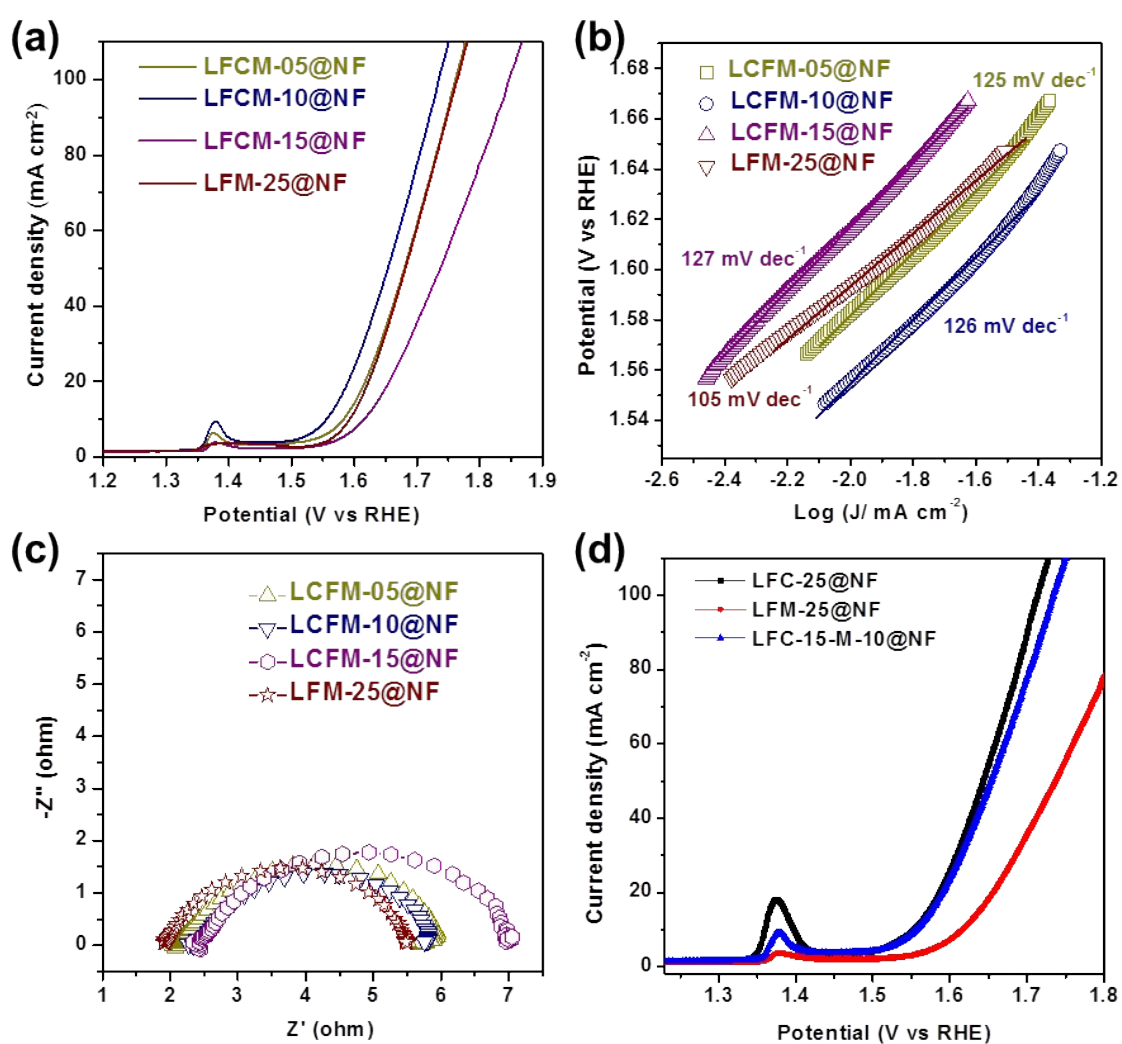

**Figure S9.** (a) LSV curves, (b) Tafel slope and (c) EIS spectra LFCMO with different Mo content.

(d) LSV curves of LFCO-25 and LFMO-25.



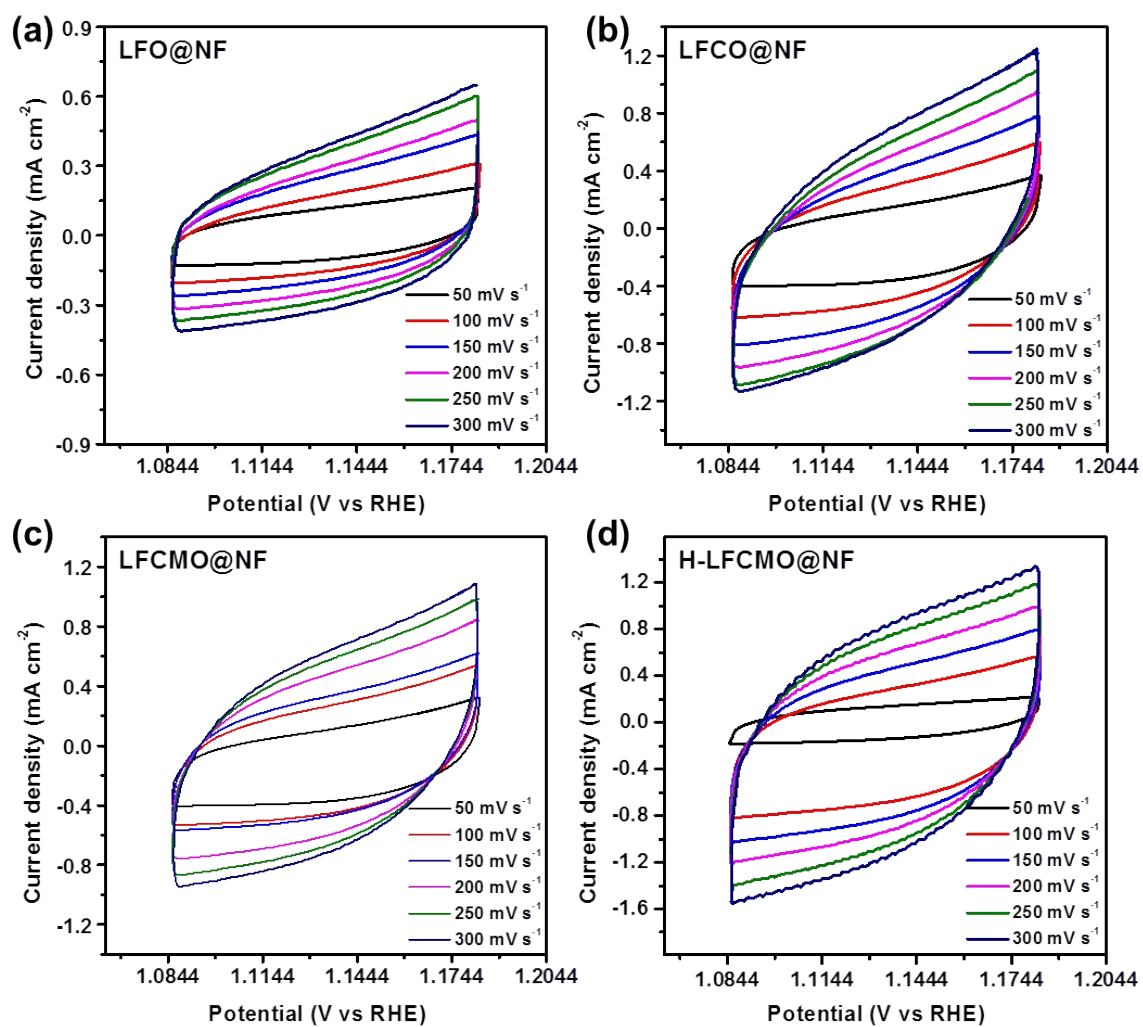

**Figure S10.** CV curves of (a) LFO, (b) LFCO, (c) LFCMO and (d) H-LFCMO at different scan rates ranging from 50 – 300 mV s<sup>-1</sup>.

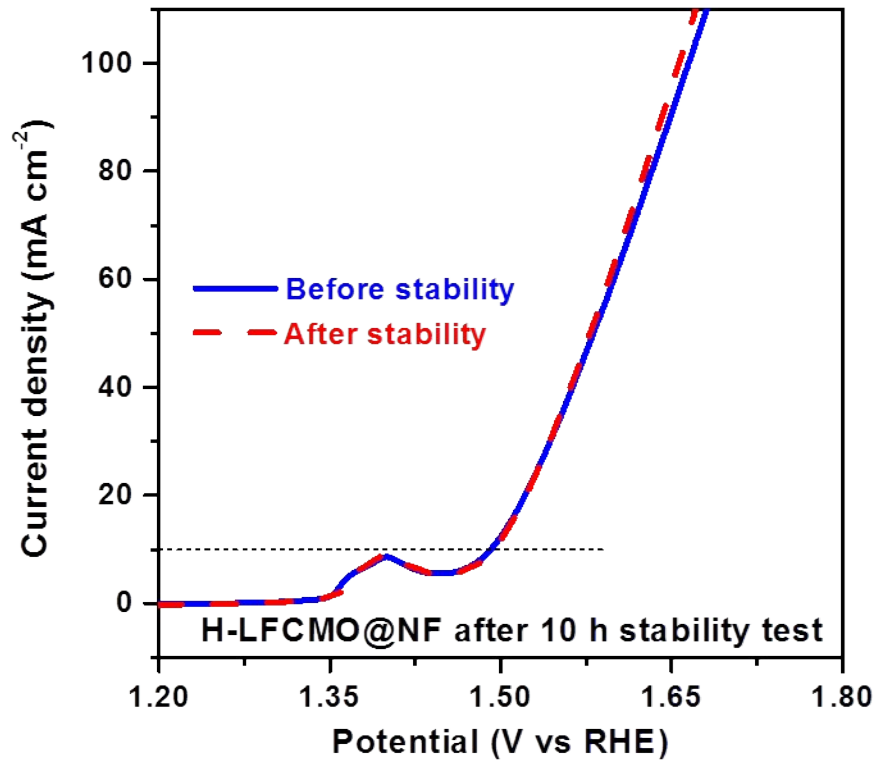

Figure S11. LSV curves of H-LFCMO before and after stability test.

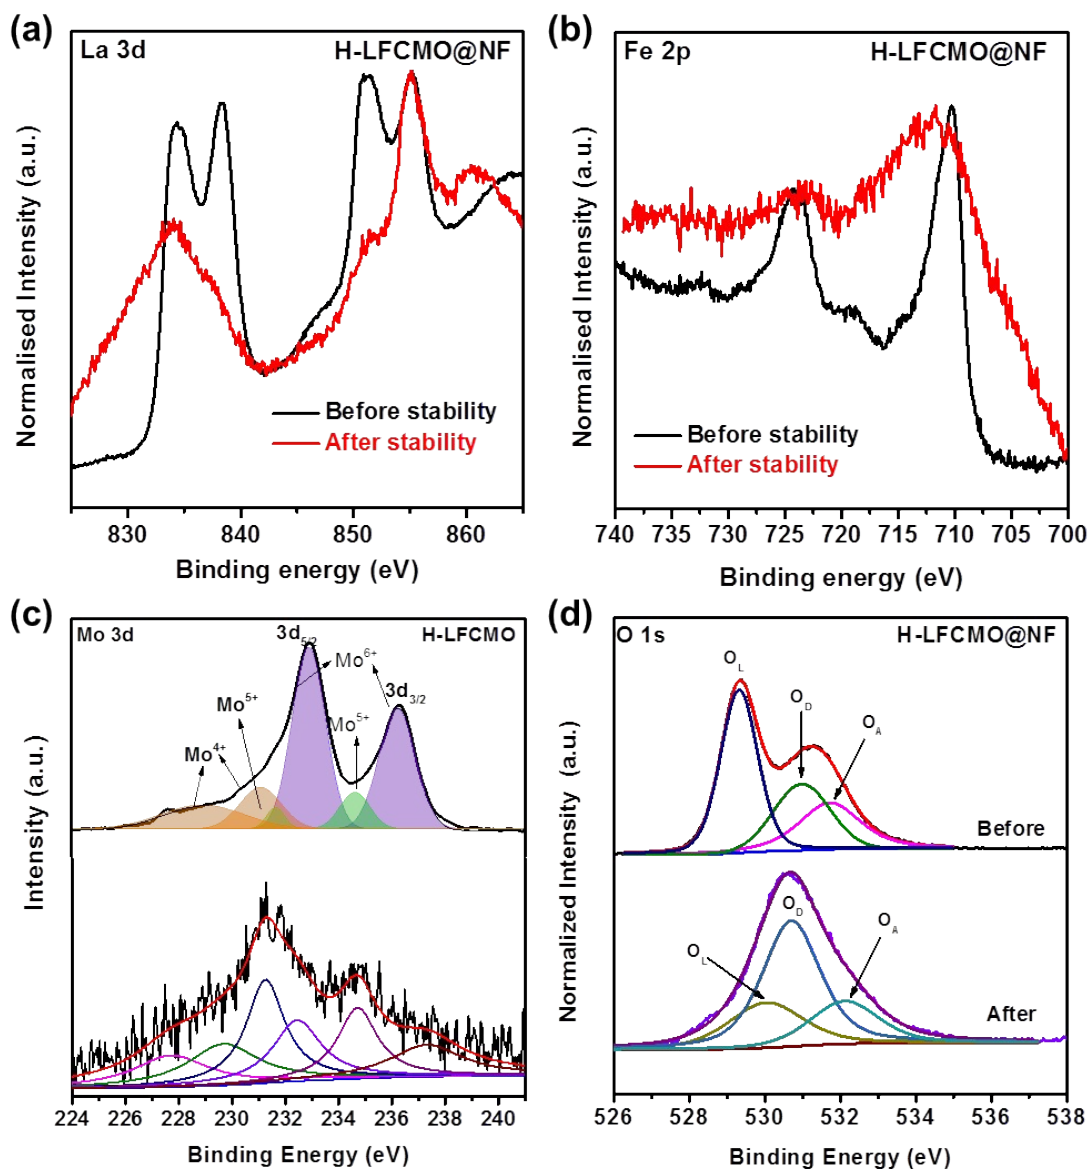

**Figure S12.** (a) La 3d, (b) Fe 2p, (c) Mo 3d and (d) O 1s XPS spectra of H-LFCMO before and after stability test.

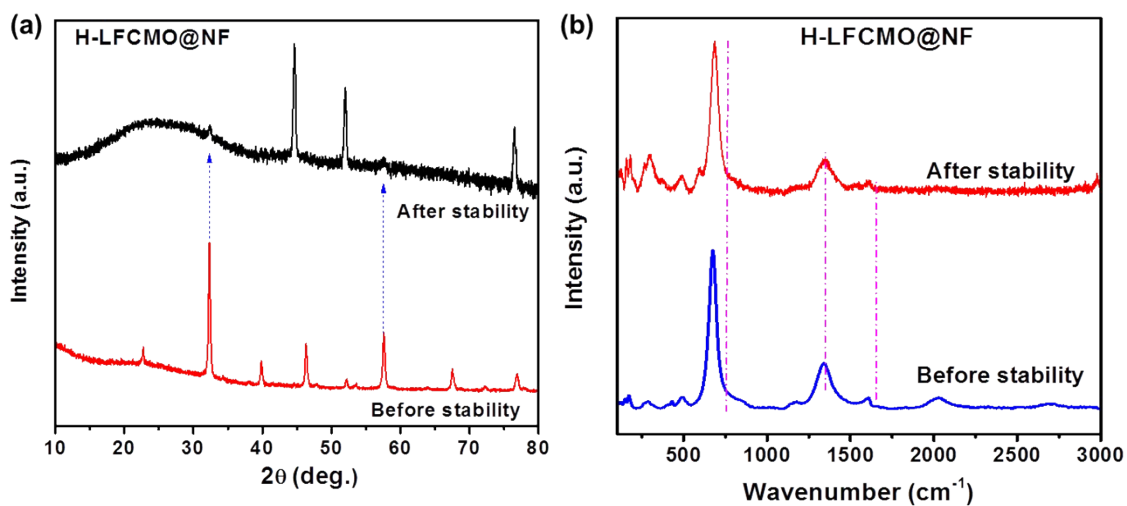

**Figure S13.** (a) XRD and (b) Raman spectra of H-LFCMO before and after stability test.

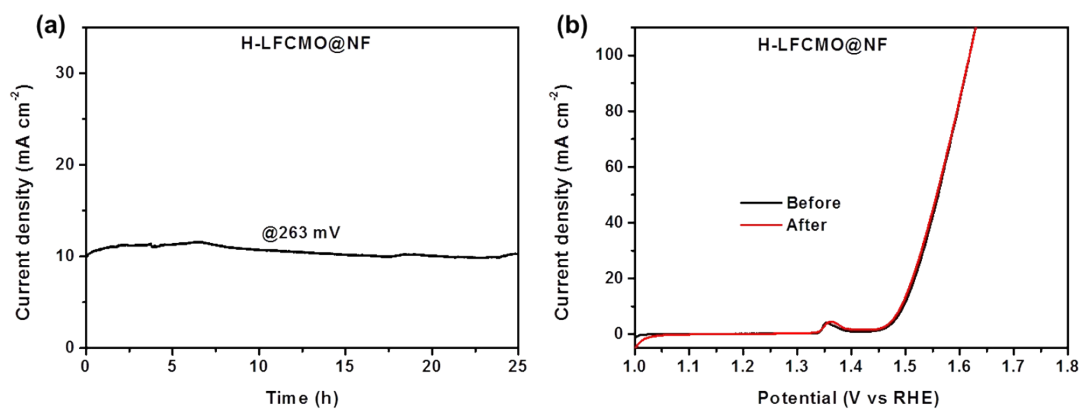

**Figure S14.** (a) Chronopotentiometry stability test of H-LFCMO@NF catalyst. (b) LSV curves of H-LFCMO@NF catalyst before and after stability test.

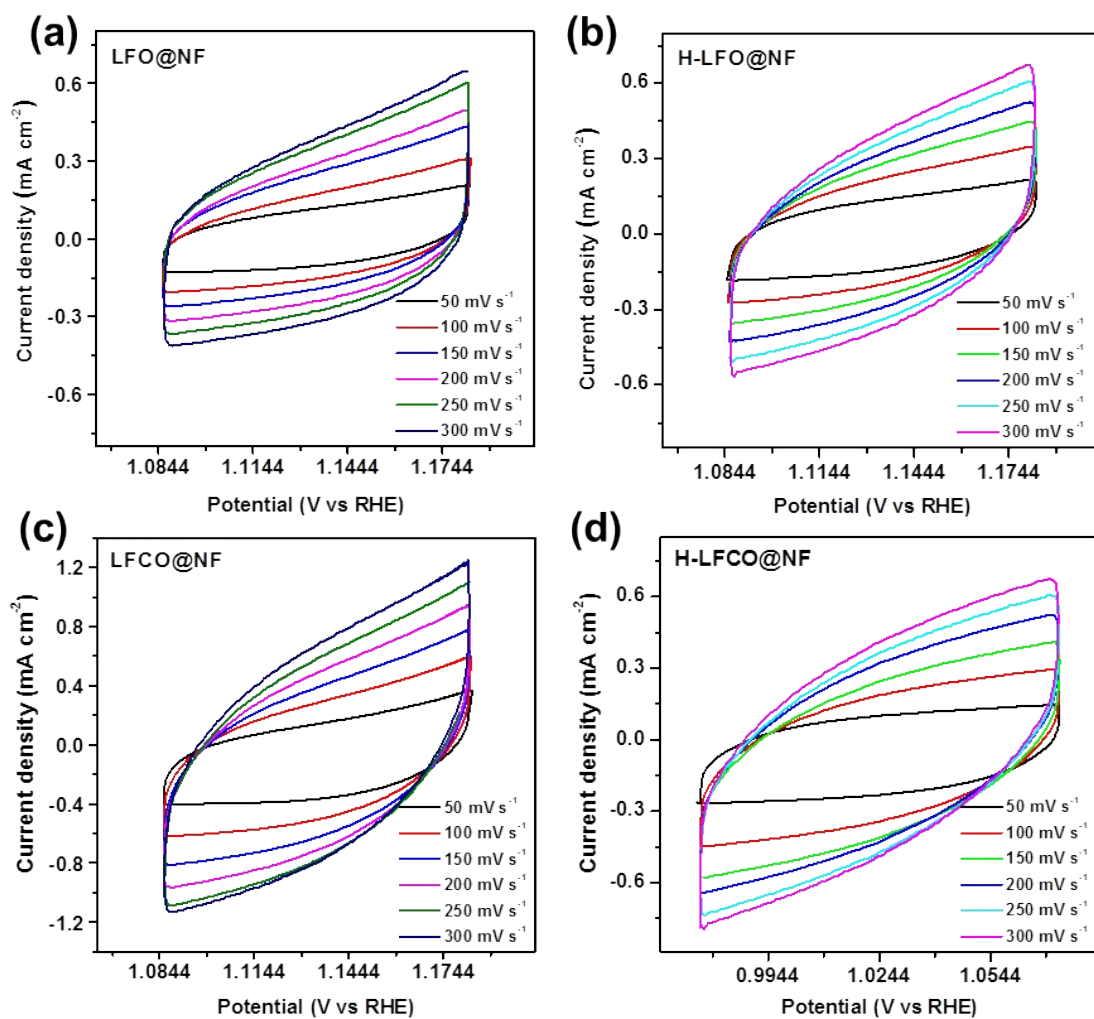

**Figure S15.** CV curves of (a) LFO, (b) H-LFO, (c) LFCO and (d) H-LFCO at different scan rates ranging from 50 – 300 mV s<sup>-1</sup>.

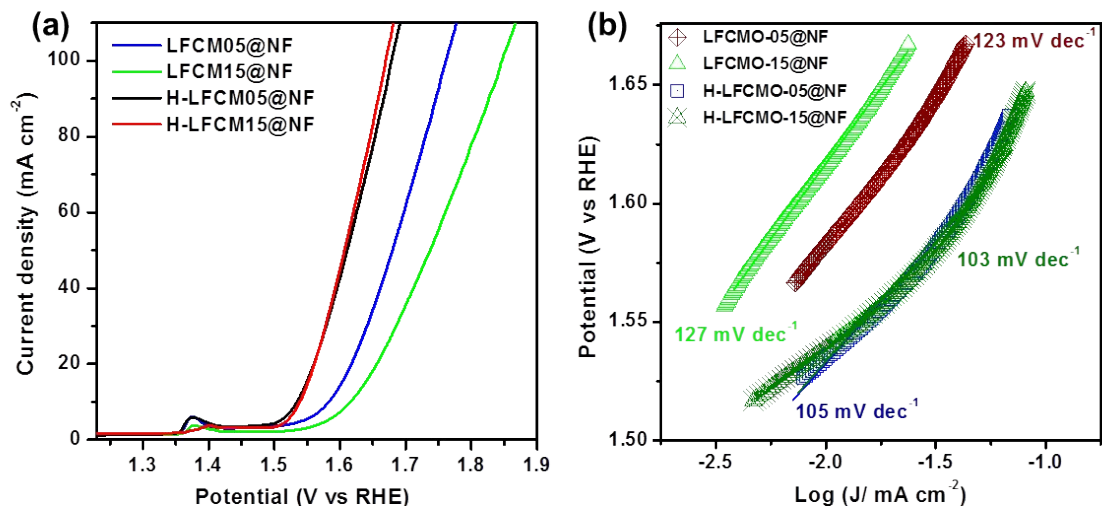

**Figure S16.** (a) LSV curves and (b) Tafel slopes of LFCMO with different Mo content and their corresponding hydrogenated catalysts.

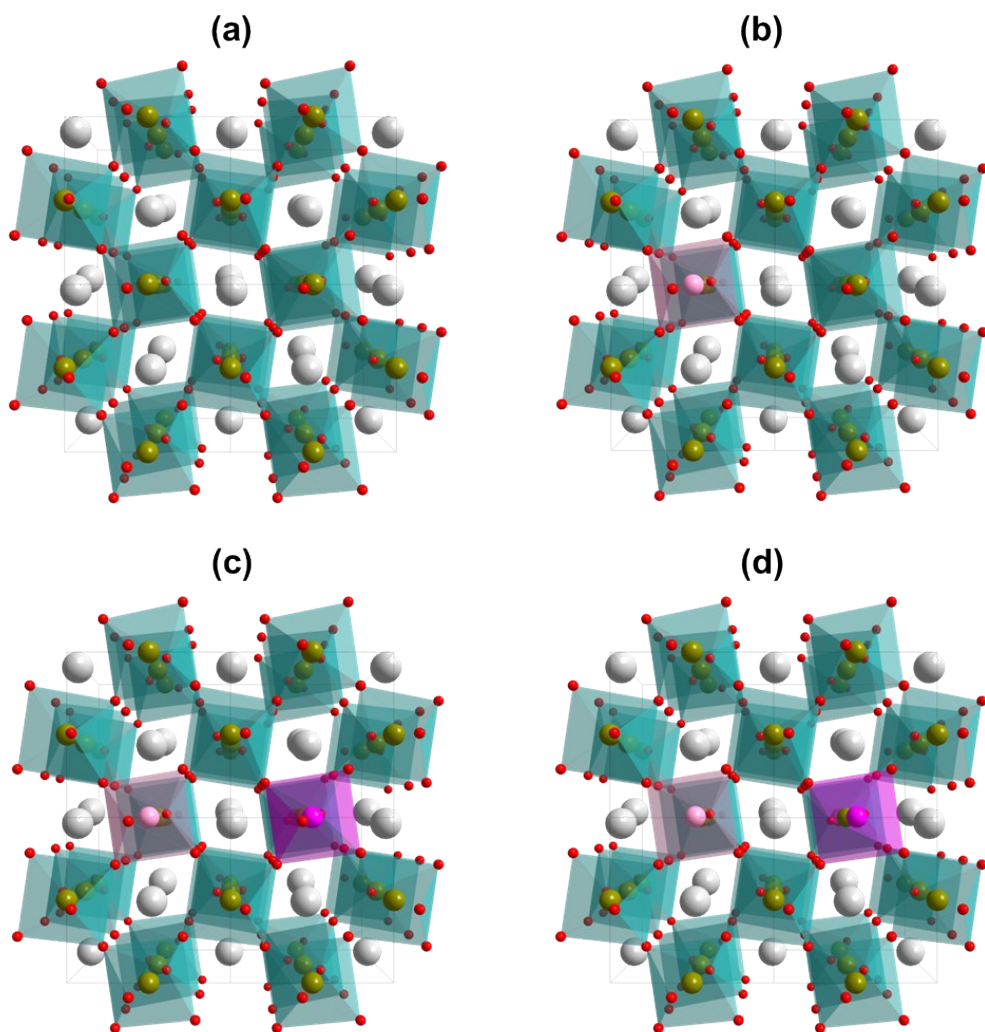

**Figure S17.** Optimized structure of (a) LFO (b) LFCO (c) LFCMO and (d) H-LFCMO. Ash, deep green, light green, pink and red balls represents La, Fe, Cr, Mo and O atoms, respectively.

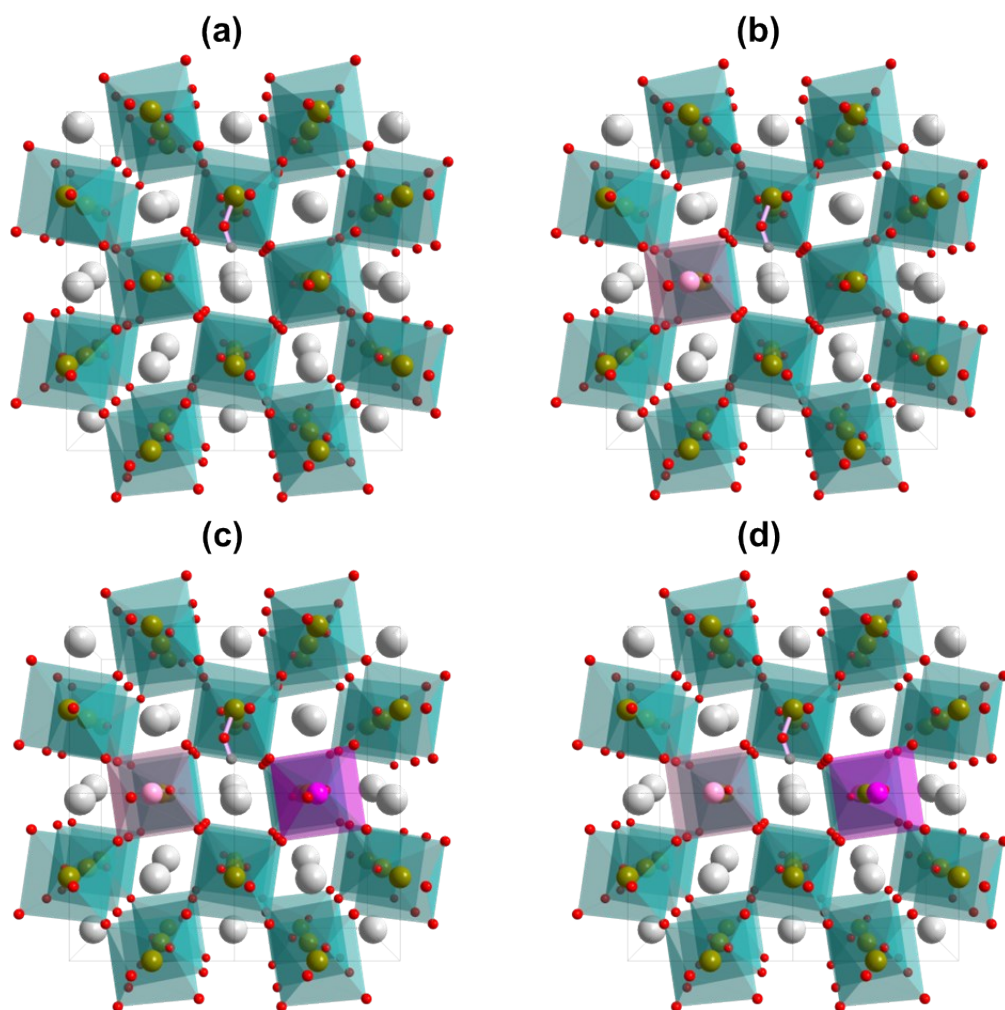

**Figure S18.** Optimized structure of (a) LFO-OH, (b) LFCO-OH, (c) LFCMO-OH and (d) H-LFCMO-OH.

Ash, deep green, light green, pink and red balls represents La, Fe, Cr, Mo and O atoms, respectively.

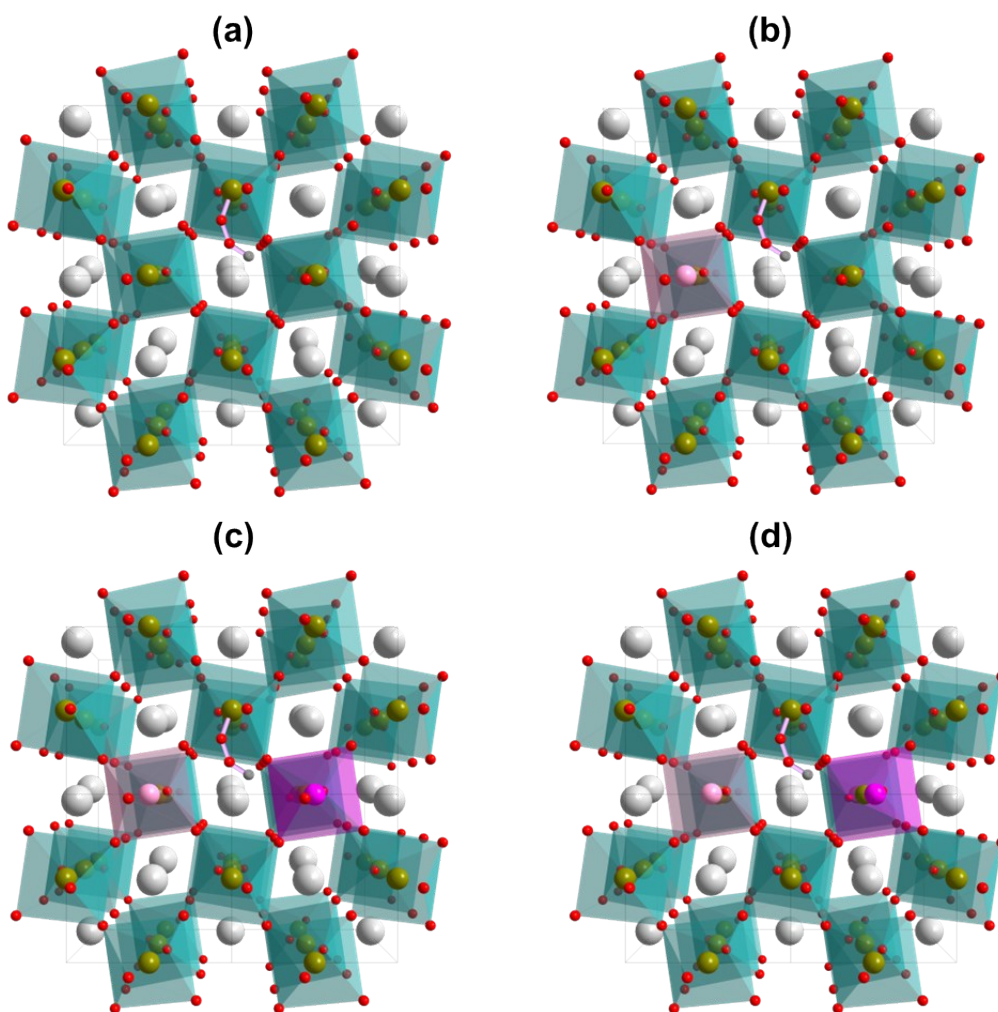

**Figure S19.** Optimized structure of (a) LFO-OOH, (b) LFCO-OOH, (c) LFCMO-OOH and (d) H-LFCMO-OOH. Ash, deep green, light green, pink and red balls represents La, Fe, Cr, Mo and O atoms, respectively.



The binding energy and the absorption energy with refer to the gaseous state of H<sub>2</sub>O and H<sub>2</sub> molecules were calculated based on Wang et al. analysis.<sup>[21]</sup> The obtained results are tabulated in Table S2 below.

**Table S3.** Calculated binding energy and absorption energy with refer to the gaseous state of H<sub>2</sub>O and H<sub>2</sub> molecules in the units of eV.

| Structures                                                             | Binding Energy |        | Absorption Energy |       |
|------------------------------------------------------------------------|----------------|--------|-------------------|-------|
|                                                                        | OH             | OOH    | OH                | OOH   |
| LaFeO <sub>3</sub>                                                     | -2.073         | -1.068 | 1.051             | 4.626 |
| LaFe <sub>0.9</sub> Cr <sub>0.1</sub> O <sub>3</sub>                   | -3.425         | -1.695 | 0.733             | 3.806 |
| LaFe <sub>0.8</sub> Cr <sub>0.1</sub> Mo <sub>0.1</sub> O <sub>3</sub> | -1.050         | -1.923 | 1.752             | 4.896 |

The calculated values for FeO<sub>2</sub> terminated LaFeO<sub>3</sub> surface is in consistent with the previous reported results. [21, 22] Among all LaFe<sub>0.8</sub>Cr<sub>0.1</sub>Mo<sub>0.1</sub>O<sub>3</sub> shows high absorption characteristics compared to the other configurations considered. The Gibbs free energy of formation from elements of FeO<sub>2</sub> terminated LaFeO<sub>3</sub> surface, LaFe<sub>0.9</sub>Cr<sub>0.1</sub>O<sub>3</sub> surface, LaFe<sub>0.8</sub>Cr<sub>0.1</sub>Mo<sub>0.1</sub>O<sub>3</sub> surface with OH\* and OOH\* species are given in Table S3. The computed Gibbs free energy of formation from the elements of LaFeO<sub>3</sub> surface is in consistent with the experimental result. [23]

**Table S4.** Calculated Gibbs free energy of formation in the units of eV.

| Structures     | Free Energy |          |          |
|----------------|-------------|----------|----------|
|                | LFO         | LFCO     | LFCMO    |
| Surface        | -11.0323    | -13.7176 | -15.5906 |
| Surface + OH*  | -13.2235    | -15.7752 | -16.3506 |
| Surface + OOH* | -15.2205    | -17.2161 | -18.7168 |

#### References:

- [1] Q. Luo, D. Lin, W. Zhan, W. Zhang, L. Tang, J. Luo, Z. Gao, P. Jiang, M. Wang, L. Hao, K. Tang, *ACS Appl. Energy Mater.* **2020**, 3, 7149.
- [2] S. Bhowmick, A. Dhankhar, T. K. Sahu, R. Jena, D. Gogoi, N. R. Peela, S. Ardo, M. Qureshi, *ACS Appl. Energy Mater.* **2020**, 3, 1279.
- [3] T. Zhao, Y. Wang, X. Chen, Y. Li, Z. Su, C. Zhao, *ACS Sustain. Chem. Eng.* **2020**, 8, 4863.
- [4] J. Xiong, H. Zhong, J. Li, X. Zhang, J. Shi, W. Cai, K. Qu, C. Zhu, Z. Yang, S. P. Beckman, H. Cheng, *Appl. Catal. B-Environ.* **2019**, 256, 117817.
- [5] S. She, Y. Zhu, Y. Chen, Q. Lu, W. Zhou, Z. Shao, *Adv. Energy Mater.* **2019**, 9, 1900429.

- [6] G. Chen, Z. Hu, Y. Zhu, Z.-G. Chen, Y. Zhong, H.-J. Lin, C.-T. Chen, L. H. Tjeng, W. Zhou, Z. Shao, *J. Mater. Chem. A* **2018**, 6, 9854.
- [7] G. Li, S. Hou, L. Gui, F. Feng, D. Zhang, B. He, L. Zhao, *Appl. Catal. B-Environ.* **2019**, 257, 117919.
- [8] G. Chen, Y. Zhu, H. M. Chen, Z. Hu, S.-F. Hung, N. Ma, J. Dai, H.-J. Lin, C.-T. Chen, W. Zhou, Z. Shao, *Adv. Mater.* **2019**, 31, 1900883.
- [9] J. Zhang, Y. Cui, L. Jia, B. He, K. Zhang, L. Zhao, *Int. J. Hydrogen. Energ.* **2019**, 44, 24077.
- [10] Y. Dai, J. Yu, Z. Zhang, C. Cheng, P. Tan, Z. Shao, M. Ni, *ACS Appl. Mater. Interfaces* **2021**, 13, 2799.
- [11] J. Zhang, S. Zhu, Y. Min, Q. Xu, *Front. Mater. Sci.* **2020**, 14, 459.
- [12] L. Fu, J. Zhou, L. Zhou, J. Yang, Z. Liu, K. Wu, H. Zhao, J. Wang, K. Wu, *Chem. Eng. J.* **2021**, 418, 129422.
- [13] Q. Guo, X. Li, H. Wei, Y. Liu, L. Li, X. Yang, X. Zhang, H. Liu, Z. Lu, *Front. Chem.* **2019**, 7.
- [14] J. Dai, Y. Zhu, Y. Zhong, J. Miao, B. Lin, W. Zhou, Z. Shao, *Adv. Mater. Interfaces* **2019**, 6, 1801317.
- [15] Z. Shen, Y. Zhuang, W. Li, X. Huang, F. E. Oropeza, E. J. M. Hensen, J. P. Hofmann, M. Cui, A. Tadich, D. Qi, J. Cheng, J. Li, K. H. L. Zhang, *J. Mater. Chem. A* **2020**, 8, 4407.
- [16] A. Curcio, J. Wang, Z. Wang, Z. Zhang, A. Belotti, S. Pepe, M. B. Effat, Z. Shao, J. Lim, F. Ciucci, *Adv. Funct. Mater.* **2021**, 31, 2008077.
- [17] C. B. Njoku, B. P. Doyle, E. Carleschi, R. J. Kriek, *Electroanal.* **2020**, 32, 3131.
- [18] S. Zhou, X. Miao, X. Zhao, C. Ma, Y. Qiu, Z. Hu, J. Zhao, L. Shi, J. Zeng, *Nat. Commun.* **2016**, 7, 11510.
- [19] H. Wang, J. Wang, Y. Pi, Q. Shao, Y. Tan, X. Huang, *Angew. Chem. Int. Ed.* **2019**, 58, 2316.
- [20] R. Majee, S. Chakraborty, H. G. Salunke, S. Bhattacharyya, *ACS Appl. Energy Mater.* **2018**, 1, 3342.
- [21] Y. Wang, H.-P. Cheng, *J. Phys. Chem. C* **2013**, 117, 2106.
- [22] I. C. Man, H.-Y. Su, F. Calle-Vallejo, H. A. Hansen, J. I. Martínez, N. G. Inoglu, J. Kitchin, T. F. Jaramillo, J. K. Nørskov, J. Rossmeisl, *ChemCatChem* **2011**, 3, 1159.
- [23] J. Cheng, A. Navrotsky, X.-D. Zhou, H. U. Anderson, *J. Mater. Res.* **2005**, 20, 191.
